# Supplementary material for: Carboxylated polymers functionalized by cyclodextrins for the stabilization of highly efficient rhodium(0) nanoparticles in aqueous phase catalytic hydrogenation
Source: Royal Society of Chemistry journal article supplement (doi:10.1039/c2dt31596c), 2012-01-01
Supplement: c2dt31596c.pdf [file c2dt31596c.pdf]

## Supporting Information

For *Dalton Transactions*.

### **Carboxylated Polymer Functionalized by Cyclodextrins for the Stabilization of Highly Efficient Rhodium(0) Nanoparticles in Aqueous Phase Catalytic Hydrogenation.**

Sébastien Noël,<sup>a,b,c</sup> Bastien Léger,<sup>a,b,c</sup> Rudy Herbois,<sup>a,b,c</sup> Anne Ponchel,<sup>a,b,c</sup> Sébastien Tilloy,<sup>a,b,c</sup> Gerhard Wenz,<sup>d</sup> Eric Monflier<sup>\*a,b,c</sup>

<sup>a</sup> *Université Lille Nord de France, F-59000 Lille, France.*

<sup>b</sup> *UArtois, Unité de Catalyse et de Chimie du Solide (UCCS), F-62307 Lens, France. Fax: +33 3 21 79 17 55; Tel: + 33 3 21 79 17 54.*

<sup>c</sup> *CNRS, UMR 8181.*

<sup>d</sup> *Universität des Saarlandes, Organische Makromolekulare Chemie, Department of Biopharmaceutics and Pharmaceutical Technology Geb. C4.2, 66123, Saarbrücken, Germany.*

**This file includes:**

1. **Figure S1.** Chemical structure of the grafted  $\beta$ -CD
2. **Figure S2.** Zeta potential distribution of **1**-Rh and **2**-Rh NPs
3. **Figure S3.** TEM image and size distribution of **1**-Rh(0) NPs after 5 successive runs

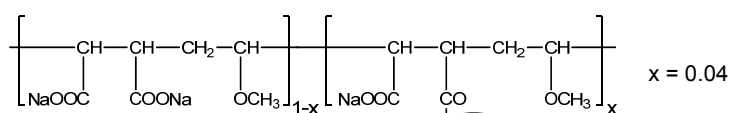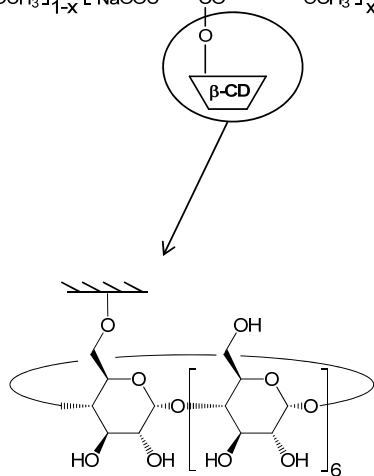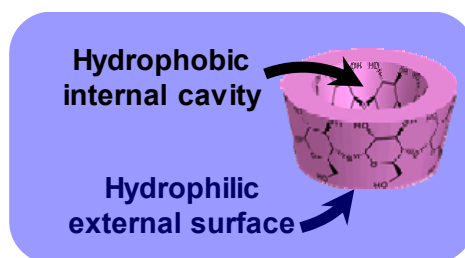

**Figure S1.** Chemical structure of the grafted  $\beta$ -CD

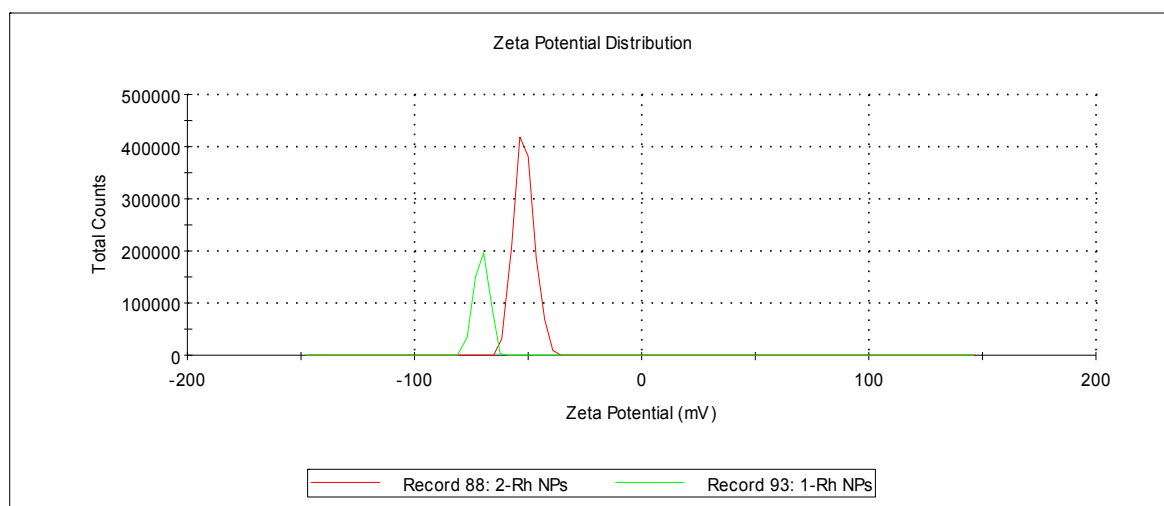

**Figure S2.** Zeta potential distribution of **1-Rh** (green) and **2-Rh NPs** (red)

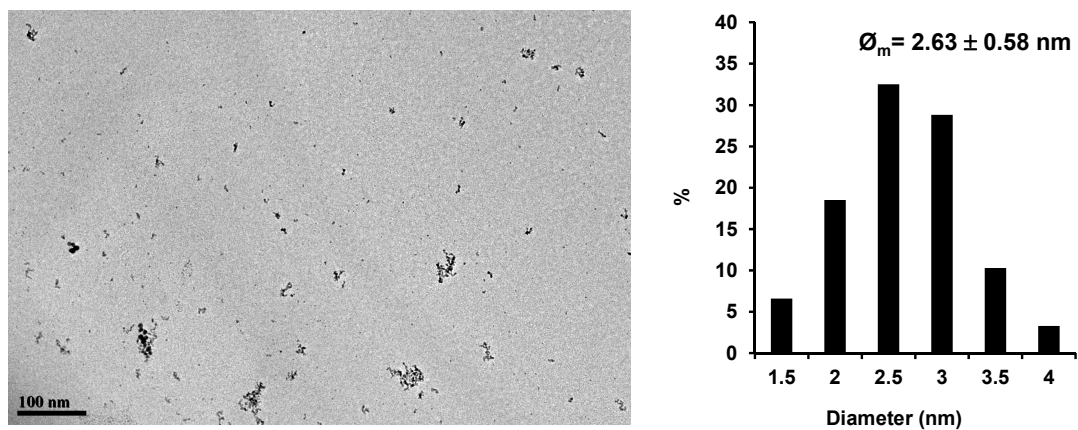

**Figure S3.** TEM image and size distribution of **1**-Rh NPs after 5 successive runs
